# Supplementary material for: Roughness Based Aczel Alsina Aggregation Operators for Multi Attribute Group Decision Making Using Pythagorean Fuzzy Information
Source: Research Square preprint supplement (doi:10.21203/rs.3.rs-7225392/v1), 2025-08-21
Supplement: Supplementary file 1 [file c08e386b33dc12dbfe4e4d52.docx]

Appendix

**Proof of Theorem 2.** We use the induction method to prove this result.

**Step 1.** For , by utilizing the PyFRAA operation, we get

By using Definition 9. we get

Now Equation (5). is valid for

Now we consider that Equation (5) valid for , i.e.,

Now for , we get

Hence, the outcome satisfies the condition for .
Now, we present some necessary axioms of the introduced PyFRAAPWA operator.

Proof of property 1. As , then by using Equation (5), we get

**Proof of Property 2.** Let be the family of PyFRVs and suppose and . Now we have , , , and , , , . Hence, we get
and

and
Therefore *.*

**Proof of Theorem 3.** We use the induction method to prove outcomes.
**Step 1.** For , by utilizing the PyFR Aczel-Alsina operation, we obtain

By using Definition 9. we get

Now Equation 6. is valid for .

Now consider that Equation 6. satisfies the condition for ,

Now for, we get

Hence, the outcome satisfies the condition for .
Now, we present some necessary axioms for the PyFRAAPWG operator.
